# Supplementary material for: Discovery of small molecule inhibitors of MyD88-dependent signaling pathways using a computational screen
Source: PubMed Central journal article supplement (PMC4585646; doi:10.1038/srep14246), 2015-09-18
Supplement: srep14246-s1.pdf [file srep14246-s1.pdf]

## SUPPLEMENTARY INFORMATION

# Discovery of small molecule inhibitors of MyD88-dependent signaling pathways using a computational screen

Mark A. Olson<sup>1</sup>, Michael S. Lee<sup>1,4</sup>, Teri L. Kissner<sup>2</sup>, Shahabuddin Alam<sup>2</sup>,

David S. Waugh<sup>3</sup>, and Kamal U. Saikh<sup>2\*</sup>

<sup>1</sup>Department of Cell Biology and Biochemistry, and <sup>2</sup>Department of Immunology, Molecular and Translational Sciences Division, U.S. Army Medical Research Institute of Infectious Diseases, Frederick, MD 21702; <sup>3</sup>Macromolecular Crystallography Laboratory, National Cancer Institute at Frederick, Frederick, MD 21702; <sup>4</sup>Computational Sciences Division, U.S. Army Research Laboratory, Aberdeen Proving Ground, MD 21005

\* Correspondence and requests for materials should be addressed to K.U.S.

([kamal.u.saikh.civ@mail.mil](mailto:kamal.u.saikh.civ@mail.mil)) or M.A.O. ([molson@compbiophys.org](mailto:molson@compbiophys.org))

Tel: (301) 619-4807; Fax: (301) 619-2348

## Supplementary Figures 1-4

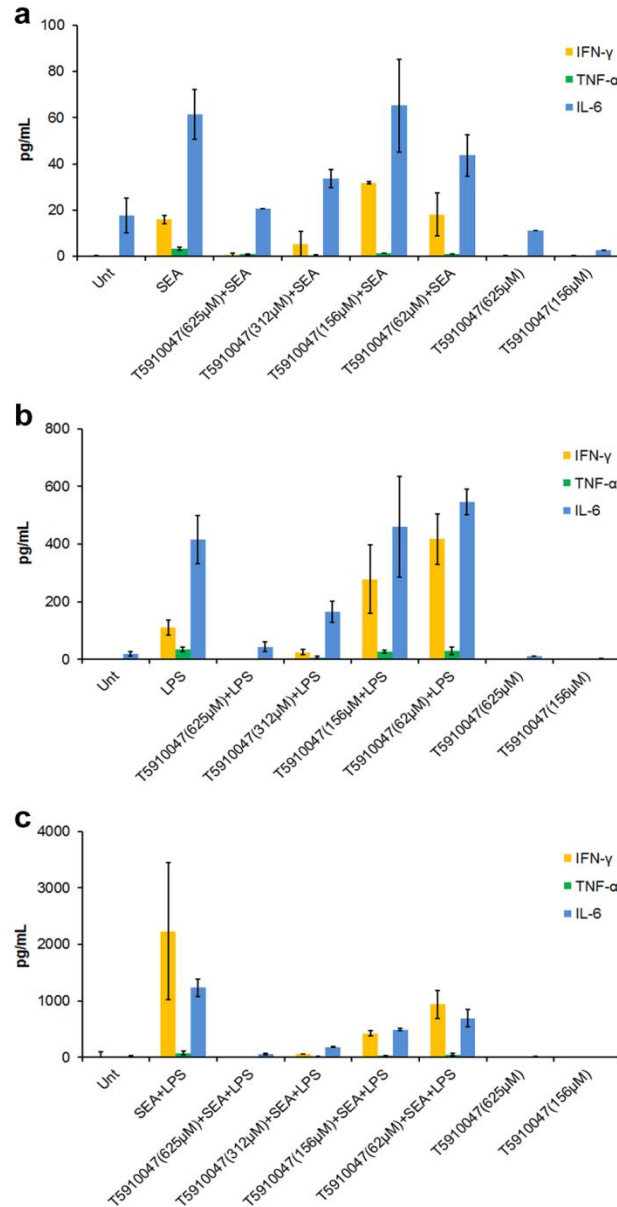

**Supplementary Figure 1 | Inhibition of SEA -induced cytokine production by T5910047 in primary culture of mouse spleen cells.** Spleen cells ( $1 \times 10^6$ ) from C57/BL6 mice were isolated as described elsewhere<sup>9</sup> and cultured for 20 h with SEA (200 ng/ml), LPS (1  $\mu$ g/ml) or SEA+LPS with or without T5910047 (625  $\mu$ M to 62  $\mu$ M) treatment. The culture supernatants were collected and measured for cytokine by CBA assay as described in materials and methods. The data presented as pg/ml cytokine production after exposure to (a) SEA, (b) LPS and (c) SEA+LPS.

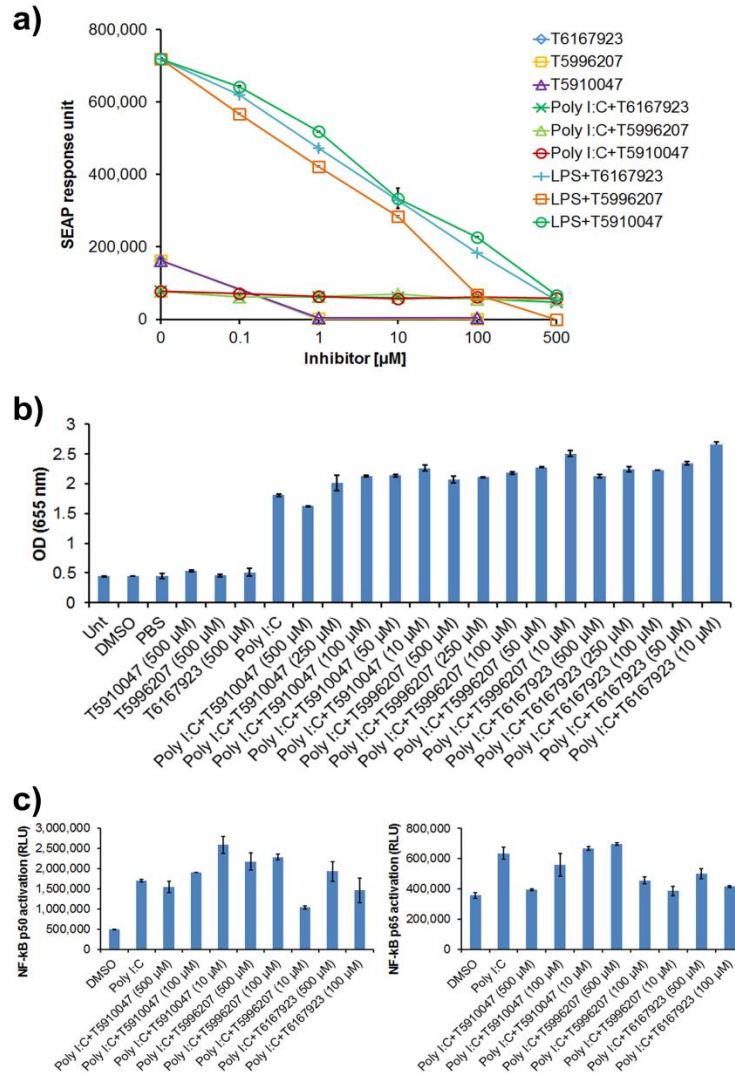

**Supplementary Figure 2| Inhibition of MyD88 dependent but not MyD88-independent expression of SEAP activity by compounds T5910047, T6167923 and T5996207.** HEK 293 stable transfected cells (TLR4-MD2-NF-kB-SEAP) was stimulated with *E. coli* LPS (1  $\mu\text{g}$ ) or poly I: C (10  $\mu\text{g}$ ) with or without varying concentrations of the compounds (500  $\mu\text{M}$  to 0.1  $\mu\text{M}$ ) respectively. Culture supernatants were tested for SEAP activity. (a) Data presented as SEAP response unit  $\pm$  SEM. HEK-Blue hTLR3 cells were used to determine a specificity control of the MyD88 inhibitors for real time detection of NF-kB induced SEAP activity after stimulation with poly I: C (10  $\mu\text{g}$ ) with or without compound treatment. Real time detection of SEAP response was determined using HEK-Blue detection medium (Invivogen) Quanti-Blue<sup>TM</sup> by reading the OD at 655 nm. (b) Data presented as OD  $\pm$  SEM as a measure of SEAP activity. ELISA-based chemiluminescence Trans AM Chemi Kit (Active Motif) and antibodies was used to detect NF-kB activation using NF-kB recognition epitope on p50 and p65 in cell extracts of HEK-Blue hTLR3 cells stimulated with poly I: C in the presence and absence of inhibitors. Assays were performed in duplicate to measure NF-kB by using equal amounts of protein (4  $\mu\text{g}$ ) from the cell extracts as described elsewhere<sup>7</sup>. (c) Data presented as a relative luminescence unit (RLU) as a

measure of NF- $\kappa$ B activation of p50 and p65 subunit, quantified using luminescence measurement.

**Table1| 2<sup>nd</sup> generation compounds (PubChem database) were tested at varying concentrations (125  $\mu$ M, 50  $\mu$ M and 5  $\mu$ M) in primary culture of human PBMCs exposed to SEB and measured cytokines in culture supernatants by MSD assay (raw data).**

| Row Labels | Samples                        | IFN- $\gamma$<br>(Human) | IL-1 $\beta$<br>(Human) | IL-6<br>(Human) | TNF- $\alpha$<br>(Human) |
|------------|--------------------------------|--------------------------|-------------------------|-----------------|--------------------------|
| U001       | MNC untreated                  | 8.441147438              | 3.5316405               | 42.306131       | 16.1557501               |
| U002       | SEB 200ng/ml<br>T6167923       | 25615.63251              | 84.6270145              | 1182.40974      | 1668.21251               |
| U003       | 125uM+SEB                      | 1.443718736              | 1.01513611              | 4.18217219      | 3.78850359               |
| U004       | T6167923 50uM+SEB              | 3.36166501               | 12.9135373              | 5.71455738      | 5.05759292               |
| U005       | T6167923 5uM+SEB<br>T6514691   | 1953.060442              | 11.7521809              | 73.6119476      | 105.005751               |
| U006       | 125uM+SEB                      | 3.533815999              | 7.743937                | 4.73761343      | 5.25897654               |
| U007       | T6514691 50uM+SEB              | 5.886078258              | 19.5638474              | 5.80708099      | 8.62322433               |
| U008       | T6514691 5uM+SEB               | 14232.68705              | 32.3457784              | 106.434784      | 931.118121               |
| U009       | T6310022 125uM+SEB             | 11.63300254              | 3.09999687              | 7.23135844      | 7.68623827               |
| U010       | T6310022 50uM+SEB              | 12.19498748              | 18.5772413              | 7.49750155      | 7.81141687               |
| U011       | T6310022 5uM+SEB<br>Z353321884 | 3617.139871              | 37.9675618              | 38.0207706      | 352.054254               |
| U012       | 125uM+SEB<br>Z353321884        | 1.655801913              | 0.84900824              | 4.29985022      | 3.83140695               |
| U013       | 50uM+SEB<br>Z353321884         | 5.479636441              | 11.0126331              | 4.98672411      | 5.36484586               |
| U014       | 5uM+SEB                        | 10571.45086              | 28.7827839              | 127.176008      | 890.382128               |
| U015       | T5629491 125uM+SEB             | 5.445722573              | 1.71101766              | 4.71422181      | 5.53406729               |
| U016       | T5629491 50uM+SEB              | 8.708475834              | 10.7268754              | 6.07647104      | 7.19517347               |
| U017       | T5629491 5uM+SEB               | 18222.73298              | 41.1688757              | 327.787491      | 1228.44191               |
| U018       | T5660019 125uM+SEB             | 9.375639426              | 5.08710863              | 6.42184428      | 6.25107426               |
| U019       | T5660019 50uM+SEB              | 4.288186253              | 12.1986029              | 5.14981855      | 5.14242363               |
| U020       | T5660019 5uM+SEB               | 8709.595853              | 34.5664821              | 431.441831      | 720.224899               |
| U021       | T5996207 125uM+SEB             | 0.800411598              | 1.49680879              | 3.84376488      | 3.16413095               |
| U022       | T5996207 50uM+SEB              | 2.808746729              | 12.1648181              | 4.64400734      | 4.68578819               |
| U023       | T5996207 5uM+SEB               | 4580.001253              | 17.3031569              | 30.7811306      | 392.564229               |
| U024       | T6178877 125uM+SEB             | 4.799985964              | 4.28489994              | 4.9400706       | 5.65028911               |
| U025       | T6178877 50uM+SEB              | 14.2048218               | 40.0047542              | 7.58862709      | 16.1557501               |
| U026       | T6178877 5uM+SEB               | 8603.732314              | 52.3935019              | 314.173684      | 937.596487               |
| U027       | T6205979 125uM+SEB             | 4.52726201               | 2.06699318              | 4.94784791      | 3.88500969               |

|      |                    |             |            |            |            |
|------|--------------------|-------------|------------|------------|------------|
| U028 | T6205979 50uM+SEB  | 5.886078258 | 12.3201816 | 5.74540793 | 4.79213236 |
| U029 | T6205979 5uM+SEB   | 1571.607943 | 20.1674905 | 15.974454  | 245.681198 |
| U030 | T6225031 125uM+SEB | 0.872551876 | 0.78520954 | 3.40841491 | 3.21813466 |
| U031 | T6225031 50uM+SEB  | 6.729951902 | 10.0856252 | 5.65282794 | 5.76641732 |
| U032 | T6225031 5uM+SEB   | 9886.483591 | 38.4222049 | 217.306594 | 862.546562 |

**Table 2| Characteristics of PubChem identified compounds: Identity (Zn ID), Molecular Weight, % structural similarity with base compound, XLogP3 values and IC<sub>50</sub> values of compounds calculated from dose response of curve of compounds (raw data as shown in Table 1)**

Base compound T 5910047

| PUBCHEM Identified Compound ID | ZN ID    | Mol. Wt. | % similarity | XLogP3-AA | IC <sub>50</sub> |       |      |       |
|--------------------------------|----------|----------|--------------|-----------|------------------|-------|------|-------|
|                                |          |          |              |           | IFN-γ            | IL-1β | IL-6 | TNF-α |
| T6167923                       | 12984105 | 458      | 80           | 2.5       | 2.7              | 2.9   | 2.66 | 2.66  |
| T6514691                       | 22090889 | 359      | 80           | 1         | 5.7              | 4.03  | 2.75 | 5.68  |
| T6310022                       | 32889556 | 492      | 90           | 3.3       | 2.9              | 4.54  | 2.58 | 3.16  |
| Z353321884                     | 26392767 | 424      | 90           | 1.4       | 4.2              | 3.79  | 2.8  | 5.32  |
| T5629491                       | 22788724 | 424      | 80           | 0.9       | 6.4              | 4.9   | 3.47 | 11.36 |
| T5660019                       | 9516570  | 429      | 90           | 1.2       | 3.79             | 4.23  | 3.97 | 4.38  |
| T5996207                       | 9942498  | 437      | 80           | 2.6       | 2.84             | 3.12  | 2.58 | 3.29  |
| T6178877                       | 26392751 | 442      | 90           | 1.5       | 3.79             | 6.57  | 3.43 | 5.68  |
| T6205979                       | 32716673 | 443      | 90           | 3         | 2.66             | 3.29  | 2.55 | 2.94  |
| T6225031                       | 32888206 | 400      | 80           | 1.8       | 4.1              | 4.54  | 3.04 | 5.2   |

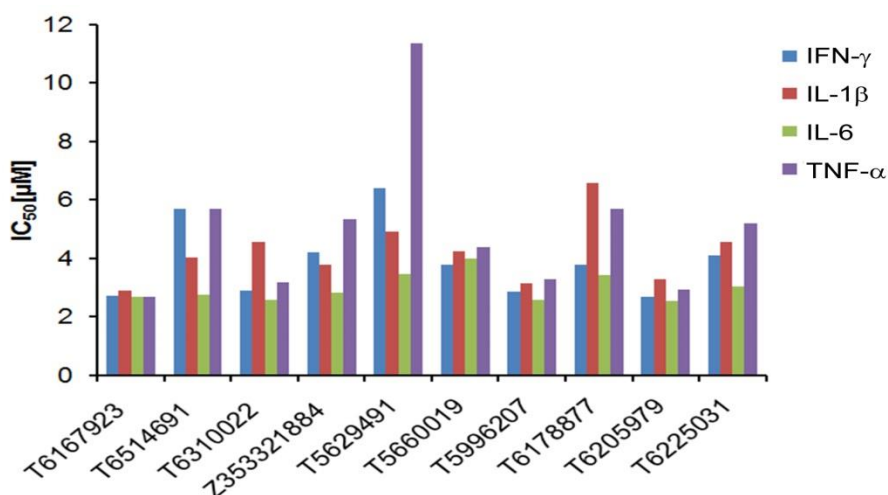

**Supplementary Figure 3| IC<sub>50</sub> of 2<sup>nd</sup> generation compounds tested in primary cultures of human PBMCs exposed to SEB.** PBMCs ( $1 \times 10^6$ ) from a normal donor was cultured for 20 h with SEB (200 ng/ml) with or without 10 different compounds [(2<sup>nd</sup> generation) identified from PubChem database that were >80% similar to T5910047] using varying concentrations (125  $\mu$ M to 5  $\mu$ M). The culture supernatants were collected and measured for cytokine by MSD assay (**Table 1**) as described in the Experimental section. The compound identity (compound ID and ZN ID), Molecular weight,% structural similarity, and X LogP values and IC<sub>50</sub> calculated as the concentration required for SEB-induced inhibition of cytokine production in PBMCs by 50% relative to the control are shown in **Table 2**. Data presented as IC<sub>50</sub>.

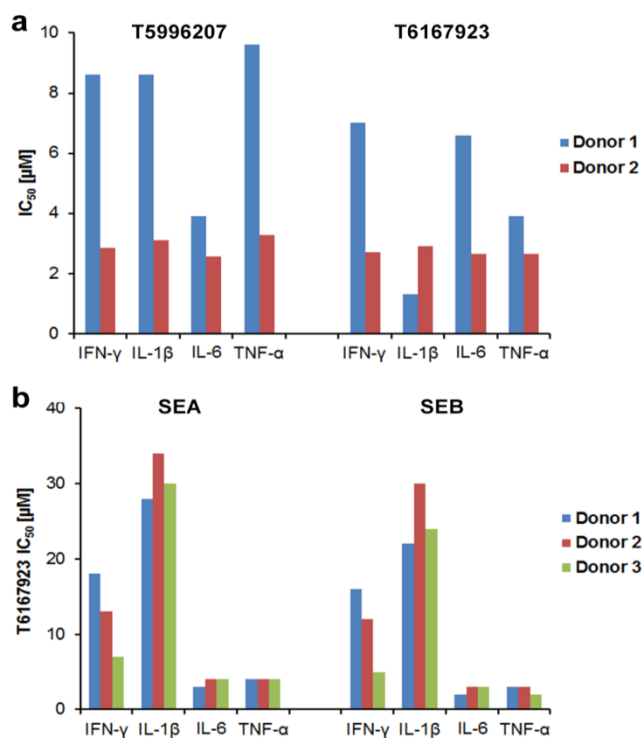

**Supplementary Figure 4| Cytokine inhibition by 2<sup>nd</sup> generation compounds T6167923 and T5996207 tested with exposure to SEB or SEA in primary cultures of human PBMCs isolated from multiple donors.** PBMCs ( $1 \times 10^6$ ) from normal donors was cultured for 20 h with SEB (200 ng/ml) with or without varying concentrations (500  $\mu$ M to 10  $\mu$ M) of T6167923 and T5996207. The culture supernatants were collected and measured for cytokine (pg/ml) by MSD assay as described in the experimental section. The data are presented as IC<sub>50</sub> values, calculated as the concentration required for SEB-induced inhibition of cytokine production in PBMCs by 50% relative to the control.(a) IC<sub>50</sub> values of T6167923 and T5996207 stimulated with SEB in two different donors;(b) IC<sub>50</sub> values of T6167923 after stimulation of PBMCs with SEA or SEB in another set of three separate donors.

## MyD88 TIR Lig score sheet

ZINC code - pose # - LigScore2 - # hydrogen bonds

ZINC12645678 2 6.61 3

ZINC12017646 1 6.43 6

ZINC10656259 2 6.42 4

ZINC09741553 1 6.36 3

ZINC09249447 2 6.36 2

ZINC11288001 1 6.35 5

ZINC12919134 **2 6.32 2**

ZINC12697596 1 6.30 4

ZINC12639365 3 6.30 3

ZINC11775323 3 6.29 5

ZINC09598946 1 6.29 3

ZINC09156431 1 6.28 3

ZINC08849913 1 6.28 2

ZINC10989256 3 6.27 4

ZINC10372625 1 6.27 3

ZINC09931075 1 6.27 3

ZINC08718730 1 6.27 2

ZINC02347144 1 6.27 3

ZINC12561210 1 6.26 4

ZINC09733262 2 6.26 3

ZINC09249447 1 6.26 2

ZINC03441998 1 6.26 5

ZINC08707939 1 6.25 1

ZINC12076562 1 6.24 3  
ZINC11591799 2 6.24 2  
ZINC11448410 1 6.24 2  
ZINC12544674 2 6.23 1  
ZINC09742768 1 6.23 5  
ZINC08923614 1 6.23 2  
ZINC09249457 2 6.22 1  
ZINC10768353 1 6.21 3  
ZINC09727257 1 6.21 2  
ZINC09700647 1 6.21 4  
ZINC08901921 1 6.21 4  
ZINC12641559 1 6.20 4  
ZINC10518185 1 6.20 2  
ZINC09467273 1 6.20 2  
ZINC08763983 1 6.19 1  
ZINC07042191 1 6.19 3  
ZINC10599911 1 6.18 2  
ZINC09779193 1 6.18 0  
ZINC10464601 1 6.16 3  
ZINC09784908 1 6.16 2  
ZINC09249155 1 6.16 3  
ZINC12686598 2 6.15 5  
ZINC11021637 1 6.15 3  
ZINC10967575 1 6.15 1  
ZINC10771971 1 6.15 2



ZINC10560140 1 6.15 2  
ZINC10458261 1 6.15 1  
ZINC10432778 1 6.15 1  
ZINC09855102 1 6.15 4  
ZINC08820249 1 6.15 2  
ZINC09517905 2 6.14 1  
ZINC09435421 1 6.14 3  
ZINC12109053 2 6.13 4  
ZINC11761420 1 6.13 4  
ZINC10896492 1 6.13 4  
ZINC09576052 1 6.13 4  
ZINC08923614 2 6.13 1  
ZINC07947566 1 6.13 5  
ZINC12889713 2 6.12 2  
ZINC11404916 1 6.12 2  
ZINC11671915 1 6.11 2  
ZINC10349894 1 6.11 3  
ZINC09931180 1 6.11 5  
ZINC09699354 1 6.11 1  
ZINC02206979 1 6.11 3  
ZINC12061732 1 6.10 4  
ZINC09583421 1 6.10 2  
ZINC08800098 1 6.10 3  
ZINC11093533 1 6.09 4  
ZINC10707080 2 6.09 3

ZINC10087643 1 6.09 2

ZINC09249447 1 6.09 3

ZINC08967022 1 6.09 4

ZINC08806699 1 6.09 3

ZINC12900818 1 6.08 3

ZINC12006544 1 6.08 4

ZINC11358244 2 6.08 2

ZINC11205546 2 6.08 1

ZINC11031418 1 6.08 3

ZINC10874601 1 6.08 2

ZINC10656259 3 6.08 4

23.08.2010

## CERTIFICATE of ANALYSIS

## 1. Identification

|                |                                                                                                       |
|----------------|-------------------------------------------------------------------------------------------------------|
| Structure      | 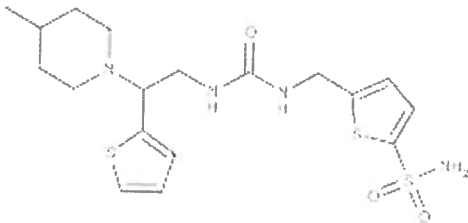                     |
| Codes          | T5910047                                                                                              |
| Name           | <b>1-[2-(4-methylpiperidin-1-yl)-2-(thiophen-2-yl)ethyl]-3-[(5-sulfamoylthiophen-2-yl)methyl]urea</b> |
| Formula        | C <sub>18</sub> H <sub>26</sub> N <sub>4</sub> O <sub>3</sub> S <sub>3</sub>                          |
| Formula weight | 442,61904                                                                                             |

## 2. Description

|                   |                |
|-------------------|----------------|
| Appearance        | Powder         |
| Colour            | brown          |
| Melting point, °C | N/A            |
| Boiling point, °C | Not determined |

## 3. NMR spectra

|                  |                           |
|------------------|---------------------------|
| File name, *.wmf | T6410962                  |
| Identity         | Agrees with the structure |

## 4. LCMS data

|                  |          |
|------------------|----------|
| File name, *.pdf | T6410962 |
| UV area, %       | 91.82    |

## 5. Comments

|          |                      |
|----------|----------------------|
| Comments | No special comments. |
|----------|----------------------|

T6410962

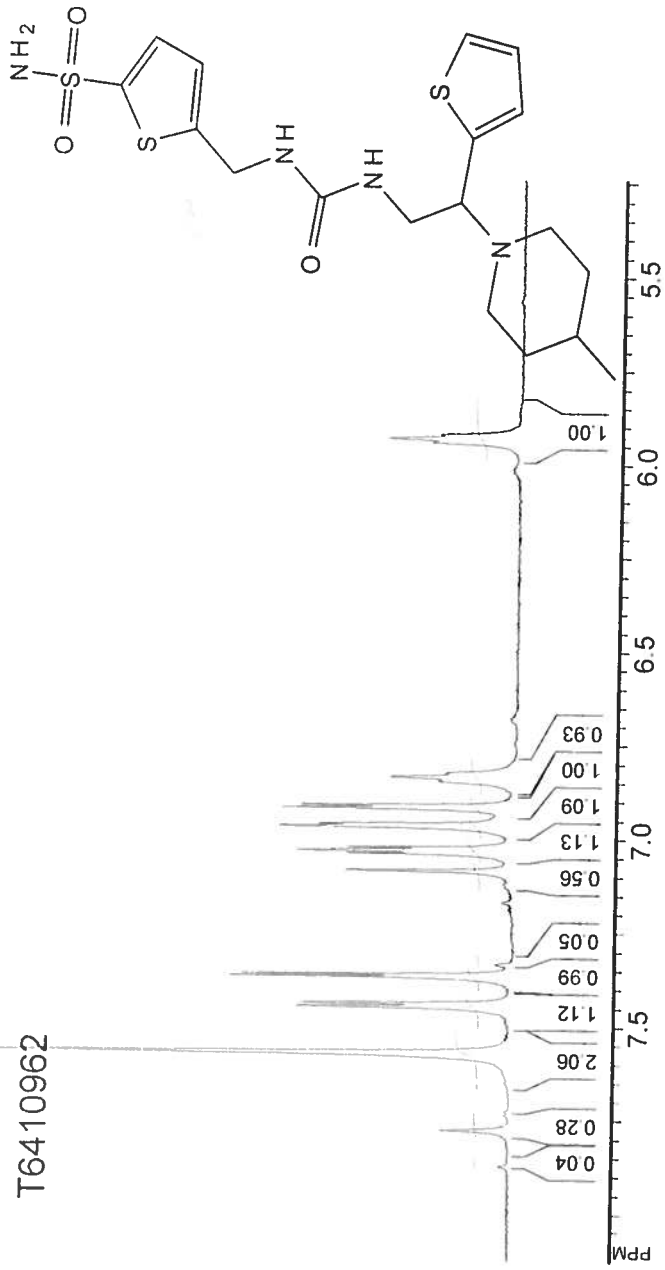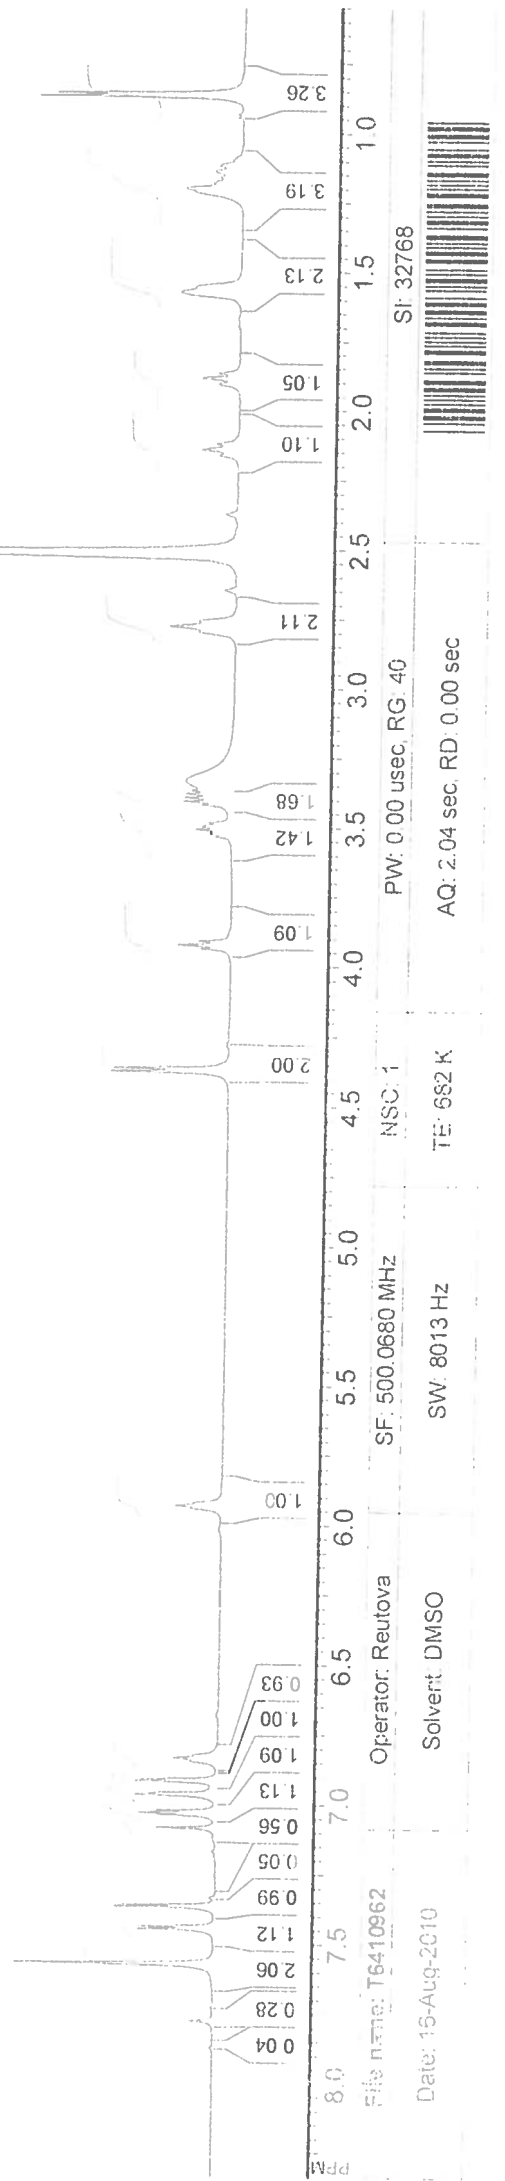

MaxPeak: 91.82%  
 Ret\_Time: 1.355 min

T6410962

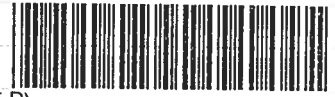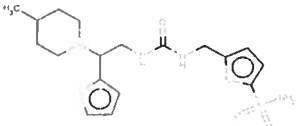

Mol Wt 442.619  
 Exact Mass 442.14

| # | Time  | Area% |
|---|-------|-------|
| 1 | 1.316 | 2.06  |
| 2 | 1.355 | 91.82 |
| 3 | 1.423 | 4.58  |
| 4 | 1.638 | 1.54  |

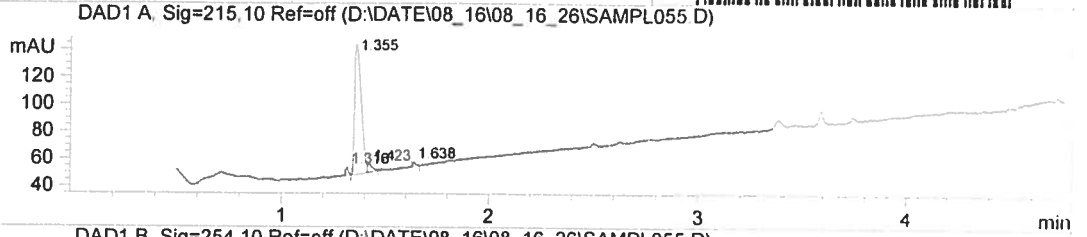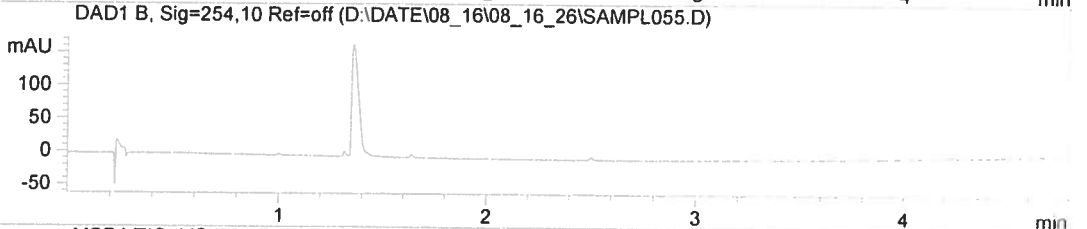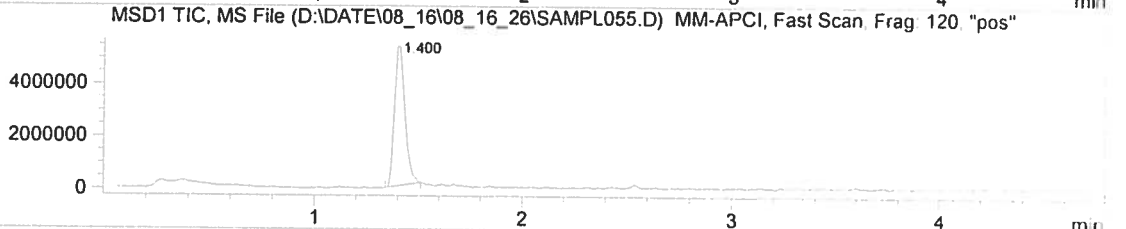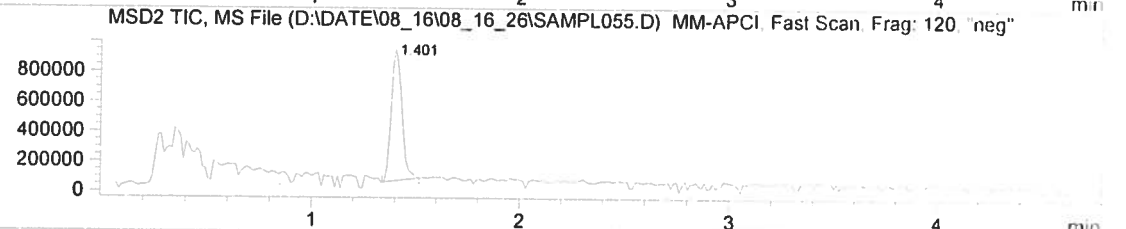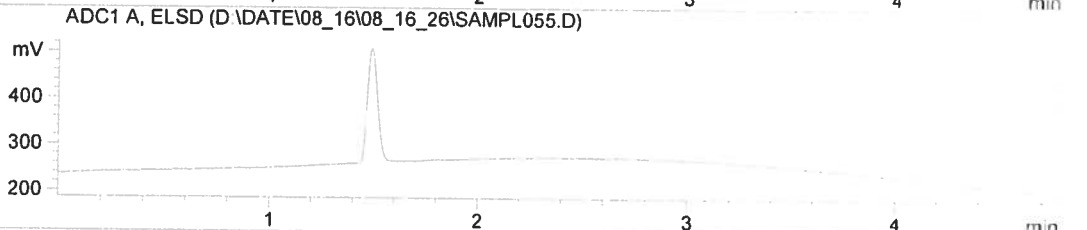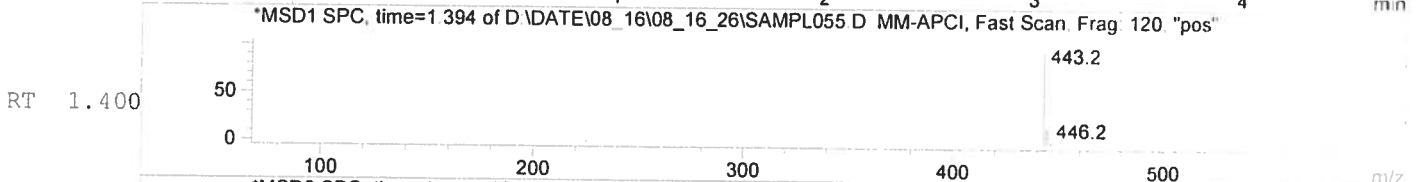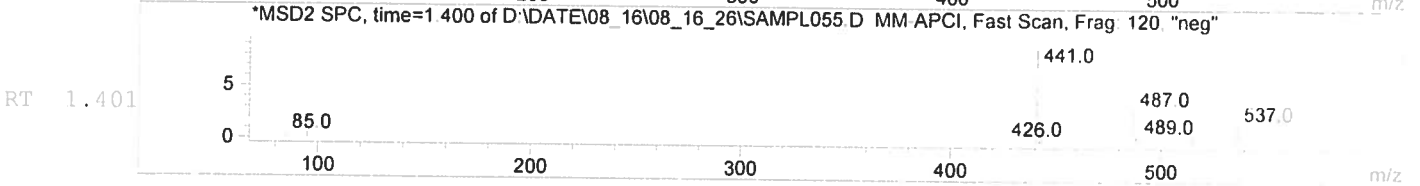

8/23/2010

## MATERIAL SAFETY DATA Sheet

### 1. Product Information

Product Name: 1-[2-(4-methylpiperidin-1-yl)-2-(thiophen-2-yl)ethyl]-3-[(5-sulfamoylthiophen-2-yl)methyl]urea  
Product Catalogue Number: T5910047

**Experimental Product for Research&Development Use Only. Not for Drug, Household or Other Use**

### 2. Composition/Information on Ingredients

Product Name: 1-[2-(4-methylpiperidin-1-yl)-2-(thiophen-2-yl)ethyl]-3-[(5-sulfamoylthiophen-2-yl)methyl]urea  
Formula: C<sub>18</sub>H<sub>26</sub>N<sub>4</sub>O<sub>3</sub>S<sub>3</sub>  
Molecular Weight: 442,61904 AMU

### 3. Hazards Identification

SPECIAL INDICATION OF HAZARDS TO HUMANS AND THE ENVIRONMENT

---

Harmful if swallowed or inhaled.

### 4 - First Aid Measures

#### AFTER INHALATION

If inhaled, remove to fresh air. If not breathing give artificial respiration. If breathing is difficult, give oxygen.

#### AFTER SKIN CONTACT

In case of skin contact, flush with copious amounts of water for at least 15 minutes. Remove contaminated clothing and shoes.

Call a physician.

#### AFTER EYE CONTACT

In case of contact with eyes, flush with copious amounts of water for at least 15 minutes. Assure adequate flushing by separating the eyelids with fingers. Call a physician.

#### AFTER INGESTION

If swallowed, wash out mouth with water provided person is conscious. Call a physician.

### 5 - Fire Fighting Measures

#### EXTINGUISHING MEDIA

Suitable: Water spray. Carbon dioxide, dry chemical powder, or appropriate foam.

#### SPECIAL RISKS

Specific Hazard(s): Emits toxic fumes under fire conditions.

#### SPECIAL PROTECTIVE EQUIPMENT FOR FIREFIGHTERS

Wear self-contained breathing apparatus and protective clothing to prevent contact with skin and eyes.

### 6 - Accidental Release Measures

#### PERSONAL PRECAUTION PROCEDURES TO BE FOLLOWED IN CASE OF LEAK OR SPILL

Evacuate area.

#### PROCEDURE(S) OF PERSONAL PRECAUTION(S)

Wear self-contained breathing apparatus, rubber boots, and heavy rubber gloves.

#### METHODS FOR CLEANING UP

Wipe dry, place a rag in a bag and hold for waste disposal. Avoid fumes inhaling. Ventilate area and wash spill site after material pickup is complete.

8/23/2010

## 7 - Handling and Storage

---

### HANDLING

Directions for Safe Handling: Do not breathe vapor. Avoid contact with eyes, skin, and clothing. Avoid prolonged or repeated exposure.

### STORAGE

Conditions of Storage: Keep tightly closed. Keep in room temperature.

Expire date: not available, reanalysis is required no more than once a year.

SPECIAL REQUIREMENTS: -

---

## 8 - Exposure Controls / Personal Protection

---

### ENGINEERING CONTROLS

Safety shower and eye bath. Mechanical exhaust required.

### GENERAL HYGIENE MEASURES

Wash thoroughly after handling.

### PERSONAL PROTECTIVE EQUIPMENT

Respiratory Protection: Government approved respirator.

Hand Protection: Compatible chemical-resistant gloves.

Eye Protection: Chemical safety goggles.

---

## 9 - Physical and Chemical Properties

---

### Property Value At Temperature or Pressure

|                       |        |
|-----------------------|--------|
| pH                    | N/A    |
| MP/MP Range           | N/A °C |
| Flash Point           | N/A    |
| Flammability          | N/A    |
| Autoignition Temp     | N/A    |
| Oxidizing Properties  | N/A    |
| Explosive Properties  | N/A    |
| Explosion Limits      | N/A    |
| Vapor Pressure        | N/A    |
| SG/Density            | N/A    |
| Partition Coefficient | N/A    |
| Viscosity             | N/A    |
| Vapor Density         | N/A    |
| Saturated Vapor Conc. | N/A    |
| Evaporation Rate      | N/A    |
| Bulk Density          | N/A    |
| Decomposition Temp.   | N/A    |
| Solvent Content       | N/A    |
| Water Content         | N/A    |
| Surface Tension       | N/A    |
| Conductivity          | N/A    |
| Miscellaneous Data    | N/A    |
| Solubility            | N/A    |

---

## 10 - Stability and Reactivity

---

### STABILITY

Stable: Stable.

Conditions of Instability:

Materials to Avoid: Strong oxidizing agents, Strong acids.

### HAZARDOUS DECOMPOSITION PRODUCTS

Hazardous Decomposition Products: Carbon monoxide, Carbon dioxide, Nitrogen oxides.

---

ENAMINE Ltd.

23 Alexandra Matrosova Street • 01103 KIEV • Ukraine

Tel.: +380 44 537 32 18 • Fax: +380 44 537 32 53

enamine@enamine.net

8/23/2010

HAZARDOUS POLYMERIZATION  
Hazardous Polymerization: Will not occur

---

### **11 - Toxicological Information**

---

N/A

---

### **12 - Ecological Information**

---

N/A

---

### **13 - Disposal Considerations**

---

#### **SUBSTANCE DISPOSAL**

Contact a licensed professional waste disposal service to dispose of this material. Dissolve or mix the material with a combustible solvent and burn in a chemical incinerator equipped with an afterburner and scrubber. Observe all federal, state, and local environmental regulations.
